# Supplementary material for: Incidence and Survival Outcomes in Patients with Lung Neuroendocrine Neoplasms in the United States
Source: PubMed Central journal article supplement (PMC8067543; doi:10.3390/cancers13081753), 2021-04-07
Supplement: cancers-13-01753-s001.pdf [file cancers-13-01753-s001.pdf]

(A) Supplementary Table 1SCLC

| Variable                | OS Hazard ratio | OS 95% Confidence Interval (CI) | p-Value |
|-------------------------|-----------------|---------------------------------|---------|
| 1988–1992 vs. 2013–2015 | 1.25            | 1.19–1.30                       | < 0.01  |
| 1993–1997 vs. 2013–2015 | 1.19            | 1.14–1.24                       | < 0.01  |
| 1998–2002 vs. 2013–2015 | 1.07            | 1.03–1.11                       | < 0.01  |
| 2003–2007 vs. 2013–2015 | 1.02            | 0.98–1.05                       | 0.365   |
| 2008–2012 vs. 2013–2015 | 1.01            | 0.99–1.03                       | 0.297   |

(B) LCNEC

| Variable                | OS Hazard ratio | OS 95% Confidence Interval (CI) | p-Value |
|-------------------------|-----------------|---------------------------------|---------|
| 1998–2002 vs. 2013–2015 | 1.09            | 0.87–1.37                       | 0.471   |
| 2003–2007 vs. 2013–2015 | 0.96            | 0.81–1.14                       | 0.635   |
| 2008–2012 vs. 2013–2015 | 1.01            | 0.92–1.12                       | 0.831   |

(C) TC

| Variable                | OS Hazard ratio | OS 95% Confidence Interval (CI) | p-Value |
|-------------------------|-----------------|---------------------------------|---------|
| 1988–1992 vs. 2013–2015 | 2.28            | 1.53–3.38                       | < 0.01  |
| 1993–1997 vs. 2013–2015 | 2.35            | 1.62–3.40                       | < 0.01  |
| 1998–2002 vs. 2013–2015 | 1.54            | 1.09–2.18                       | 0.015   |
| 2003–2007 vs. 2013–2015 | 1.30            | 0.97–1.74                       | 0.082   |
| 2008–2012 vs. 2013–2015 | 1.03            | 0.83–1.27                       | 0.810   |

(D) AC

| Variable                | OS Hazard ratio | OS 95% Confidence Interval (CI) | p-Value |
|-------------------------|-----------------|---------------------------------|---------|
| 1998–2002 vs. 2013–2015 | 1.39            | 0.58–3.36                       | 0.461   |
| 2003–2007 vs. 2013–2015 | 0.85            | 0.43–1.71                       | 0.652   |
| 2008–2012 vs. 2013–2015 | 1.24            | 0.84–1.81                       | 0.280   |

**Table S1.** (A) Multivariable Cox proportional hazards regression model highlighting OS change over time based on 5 years comparison among patients with SCLC. (B) Multivariable Cox proportional hazards regression model highlighting OS change over time based on 5 years comparison among patients with LCNEC. (X) Multivariable Cox proportional hazards regression model highlighting OS change over time based on 5 years comparison among patients with TC. (D) Multivariable Cox

proportional hazards regression model highlighting OS change over time based on 5 years comparison among patients with AC.
